# Predicting Cardiac Arrhythmias and Sudden Death in Diabetic Users of Proarrhythmic Drugs

MARIE L. DE BRUIN, PHD<sup>1,2</sup>  
TJEERD P. VAN STAA, PHD<sup>1,3</sup>  
SVETLANA V. BELITSER, MSC<sup>1</sup>

HUBERT G.M. LEUFKENS, PHD<sup>1</sup>  
ARNO W. HOES, MD<sup>2</sup>

In diabetic patients, the corrected QT (QTc) interval is relatively long (1). In accordance with the concept of “reduced repolarization reserve” (2), a subsequent increase in QTc interval by proarrhythmic drugs may lead to cardiac arrhythmias and sudden death. Recently, it was shown that patients with diabetes are at increased risk of drug-induced arrhythmias (3). We developed a decision tool to predict the risk of serious ventricular arrhythmias and sudden death among diabetic users of nonantiarrhythmic proarrhythmic drugs.

## RESEARCH DESIGN AND

**METHODS**— A cohort study among 61,280 diabetic patients using nonantiarrhythmic proarrhythmic medication (amitriptyline, astemizole, chloroquine, chlorpromazine, cisapride, clarithromycin, clomipramine, cotrimoxazole, diphenhydramine/dimenhydrinate, domperidone, doxepine, droperidol, erythromycin, grepafloxacin, halofantrine, haloperidol, indapamide, ketanserin, lidoflazine, mianserine, pentamidine, pimozide, probucol, promethazine, protriptyline, sulfamethoxazole, sultopride, tacrolimus, terfenadine, terodiline, thioridazine, trimethoprim, and zimeldine) (4) in the General Practice Research Database

(1987–2001) was performed. This database contains computerized medical records of ~650 general practices, including ~6.5% of the population of England and Wales. Diabetic patients were followed from the 1st day of prescription of any nonantiarrhythmic proarrhythmic drug. Follow-up was censored when the duration of (one of) the prescription(s) had elapsed, when the study outcome occurred, in case of death, upon exit from the study population, or at the end of the study period, whichever of these events came first. The combined study outcome included ventricular tachycardia, ventricular fibrillation and flutter, cardiac arrest, and sudden death. Candidate predictors included:

- sex, age, and diabetes duration
- morbidities, i.e., other cardiac arrhythmias (mainly atrial fibrillation), ischemic heart disease, heart failure, hypertension (5), and pulmonary disease (6)
- concomitant medication associated with potassium imbalance or ventricular arrhythmias, i.e., antiarrhythmic drugs (7), oral potassium, and blood potassium-lowering drugs (8), including non-potassium-sparing diuretics (9), laxatives, systemic corticosteroids, or  $\beta_2$ -agonists (10)

- prescription characteristics, i.e., dosage and prescriptions for the same drug during the previous year
- lifestyle factors, i.e., smoking (11) and BMI (12,13)

All candidate predictors were included in a multivariate logistic regression model that was reduced by deleting predictors with *P* values >0.15, based on the log likelihood ratio test. The model was internally validated using bootstrapping techniques. The performance of the final model (goodness of fit and discriminative ability) was tested by the Hosmer and Lemeshow test and by calculating the area under the receiver operator characteristic (ROC) curve. To obtain an easily applicable rule, regression coefficients from the final model were multiplied by 10 and rounded to the nearest integer.

**RESULTS**— The 61,280 diabetic patients (mean age 65 years) received one or more nonantiarrhythmic proarrhythmic drugs during 396,853 physician visits. Mean prescription length was 26 days. During follow-up, 94 events occurred (incidence 24 of 100,000 prescriptions), including 49 sudden deaths, 34 cardiac arrests, and 11 ventricular arrhythmias.

Events were more frequent in men and in older patients. Other cardiac arrhythmias, ischemic heart disease, and heart failure as well as all concomitant medications studied were associated with the outcome (Table 1, crude association). The majority (77%) of prescribed drugs were psychotropic (174,183 prescriptions) or antimicrobial (130,778 prescriptions) medications, with amitriptyline (82,745 prescriptions), trimethoprim (58,261 prescriptions), and erythromycin (47,262 prescriptions) the most frequently used drugs. On 11,848 occasions two or more proarrhythmic drugs were prescribed at the same time. Halofantrine, ketanserin, lidoflazine, pentamidine, sulfamethoxazol (without trimethoprim), sultopride, and zimeldine were not prescribed.

The initial multivariable model with

From the <sup>1</sup>Department of Pharmacoepidemiology and Pharmacotherapy, Utrecht Institute for Pharmaceutical Sciences, Utrecht, the Netherlands; the <sup>2</sup>Julius Centre for Health Sciences and Primary Care, University Medical Centre, Utrecht, the Netherlands; and the <sup>3</sup>Environmental Epidemiology Unit, Medical Research Council, Southampton University Hospital, Southampton, U.K.

Address correspondence and reprint requests to M.L. De Bruin, PharmD, Utrecht Institute for Pharmaceutical Sciences, Department of Pharmacoepidemiology and Pharmacotherapy, P.O. Box 80082, 3508 TB Utrecht, Netherlands. E-mail: m.l.debruin@pharm.uu.nl.

Received for publication 10 October 2004 and accepted in revised form 27 October 2004.

**Abbreviations:** ROC, receiver operator characteristic; QTc, corrected QT.

A table elsewhere in this issue shows conventional and Système International (SI) units and conversion factors for many substances.

© 2005 by the American Diabetes Association.

The costs of publication of this article were defrayed in part by the payment of page charges. This article must therefore be hereby marked “advertisement” in accordance with 18 U.S.C. Section 1734 solely to indicate this fact.

Table 1—Incidence, crude associations, and final bootstrapped model of association between predictors and outcome

| Candidate predictor                     | Incidence |         |      | Crude association |         | Final model |       |
|-----------------------------------------|-----------|---------|------|-------------------|---------|-------------|-------|
|                                         | Events    | Rx      | Inc* | OR† (95% CI)      | P value | OR          | Score |
| Sex (male)                              | 51        | 153,178 | 33   | 2.49 (1.12–5.53)  | 0.025   | 2.26        | 8     |
| Age (years)                             | 63.6 ± 18 |         |      | 1.03 (1.00–1.06)  | 0.024   | 1.02        | 0.2   |
| Diabetes duration (years)               | 1.9 ± 2.1 |         |      | 0.99 (0.83–1.18)  | 0.889   |             |       |
| Comorbidity                             |           |         |      |                   |         |             |       |
| Other arrhythmia                        | 17        | 30,596  | 56   | 4.18 (1.77–9.85)  | 0.001   | 2.02        | 7     |
| Ischemic heart disease                  | 40        | 84,835  | 47   | 3.22 (1.51–6.85)  | 0.002   | 1.89        | 6     |
| Heart failure                           | 33        | 48,035  | 69   | 3.18 (1.40–7.21)  | 0.006   |             |       |
| Elevated blood pressure                 | 38        | 155,256 | 24   | 1.26 (0.59–2.72)  | 0.549   |             |       |
| Pulmonary disease                       | 14        | 63,012  | 22   | 1.11 (0.40–3.12)  | 0.842   |             |       |
| Concomitant drugs                       |           |         |      |                   |         |             |       |
| Antiarrhythmics                         | 4         | 2,213   | 181  | 8.02 (1.33–48.4)  | 0.023   |             |       |
| Oral potassium                          | 4         | 3,051   | 131  | 4.70 (0.47–47.4)  | 0.190   |             |       |
| Potassium-lowering drugs‡               | 51        | 145,130 | 35   | 2.10 (0.98–4.49)  | 0.056   |             |       |
| Study drugs                             |           |         |      |                   |         |             |       |
| ≥2 defined daily doses/day              | 6         | 28,475  | 21   | 0.77 (0.17–3.53)  | 0.732   |             |       |
| Prescription for current drug last year | 69        | 292,096 | 24   | 0.93 (0.42–2.08)  | 0.862   |             |       |
| Smoking                                 | 19        | 86,994  | 22   | 0.68 (0.24–1.95)  | 0.475   |             |       |
| BMI (kg/m <sup>2</sup> )                |           |         |      |                   |         |             |       |
| <20                                     | 5         | 17,426  | 29   | 1.18 (0.17–8.49)  | 0.959   |             |       |
| 20–25                                   | 17        | 90,799  | 19   | Reference         |         |             |       |
| 25–30                                   | 37        | 145,965 | 25   | 1.17 (0.42–3.29)  |         |             |       |
| ≥30                                     | 35        | 142,663 | 25   | 1.33 (0.48–3.70)  |         |             |       |
| Total                                   | 94        | 396,853 | 24   |                   |         |             |       |

Data are means ± SD unless otherwise indicated. \*Incidence per 100,000 prescriptions; †OR per year; ‡non-potassium-sparing diuretics, laxatives, systemic corticosteroids, or systemic  $\beta_2$ -agonists. Rx, prescription(s).

all 15 predictors yielded an ROC area of 0.71 (95% CI 0.66–0.77). Of these 15, only 4 predictors, i.e., age, sex, ischemic heart disease, and other cardiac arrhythmia than the study outcome, independently contributed to the prediction of the outcome defined as a  $P$  value  $\leq 0.15$ . The other univariate predictors were not independent predictors in the multivariable analysis. Apparently, their predictive information was already provided for by the four retained predictors. The reduced model including the four predictors yielded an ROC area of 0.69 (0.63–0.74), and after bootstrapping, the ROC area of the final model remained at 0.69 (0.63–0.74), which is regarded as reasonable. The goodness of fit of this final model was excellent ( $P$  value by Hosmer and Lemeshow test 0.91).

The risk score for predicting serious ventricular arrhythmias and sudden death among diabetic users of proarrhythmic drugs derived from the final model was age (years)  $\times 0.2$  + male sex  $\times 7$  + other arrhythmias than the study outcome  $\times 8$  + ischemic heart dis-

ease  $\times 6$  points. A male (7 points) of 60 years of age ( $60 \times 0.2 = 12$  points) with ischemic heart disease (6 points) without history of any cardiac arrhythmias (0 points), for example, receives a risk score of  $8 + 12 + 6 = 25$  points. Patients can be divided into five risk groups according to their risk score. A score of  $<15$  points corresponds to a probability for the study outcome of  $<25$  per 100,000 prescriptions. Scores between 15 and 21, 22 and 25, and 26 and 28 correspond to probabilities between 25 and 50, 50 and 75, and 75 and 100 events per 100,000 prescriptions, respectively. Patients with a score  $\geq 29$  have a probability of  $>100$  per 100,000 prescriptions for ventricular arrhythmias and sudden death and have a more than four times increased risk for an arrhythmic event compared with the lowest category.

In clinical practice, a prescribing physician may wish to define a cutoff point above which additional security measures, e.g., pretherapy electrocardiogram measurements or prescribing therapeutic alternatives, are required. Sensitivity and

specificity are important measures to evaluate the consequences of such a threshold. The sensitivity of cutoff points 15, 22, 26, and 29 were 0.85, 0.49, 0.27, and 0.15, respectively. Corresponding specificities were 0.37, 0.78, 0.91, and 0.96, respectively. When taking extra security measures for patients with a score  $\geq 29$ , 15% of the 94 prescriptions during which an event actually happened would be treated correctly (sensitivity or true-positive rate), whereas in those with a score  $<29$ , in 96% extra security measures are correctly withheld (specificity or true-negative rate).

**CONCLUSIONS** — As for the interpretation of results and design, one should bear in mind that this study was not designed to study the use of drugs as an etiologic cause of cardiac arrhythmias. This prognostic study, without an unexposed control group, was designed to be applicable to patients exposed to proarrhythmic drugs and to identify prognostic factors to predict the outcome among those who must be exposed.

We found that the absolute risk of serious ventricular arrhythmias and sudden death among diabetic users of nonantiarrhythmic proarrhythmic drugs is low. The provided scoring rule can be used to identify patients with a considerable increased risk. Prescribing proarrhythmic drugs to these patients should be reconsidered or closely monitored.

# References

1. Bednar MM, Harrigan EP, Anziano RJ, Camm AJ, Ruskin JN: The QT interval. *Prog Cardiovasc Dis* 43:1–45, 2001
2. Roden DM: Taking the “idio” out of “idiosyncratic”: predicting torsades de pointes. *Pacing Clin Electrophysiol* 21:1029–1034, 1998
3. Pathak A, Tournamille JF, Senard JM, Montastruc JL, Lapeyre-Mestre M: Diabetes increases the risk of drug-induced Torsade de Pointes: analysis of data from the French pharmacovigilance database (Abstract). *Pharmacoepidemiol Drug Saf* 13 (Suppl. 1):S204, 2004
4. De Ponti F, Poluzzi E, Vaccheri A, Bergman U, Bjerrum L, Ferguson J, Frenz KJ, McManus P, Schubert I, Selke G, Terzis-Vaslamatzis G, Montanaro N: Non-antiarrhythmic drugs prolonging the QT interval: considerable use in seven countries. *Br J Clin Pharmacol* 54:171–177, 2002
5. Elming H, Brendorp B, Kober L, Sahebzada N, Torp-Petersen C: QTc interval in the assessment of cardiac risk. *Card Electrophysiol Rev* 6:289–294, 2002
6. De Bruin ML, Hoes AW, Leufkens HGM: QTc-prolonging drugs and hospitalizations for cardiac arrhythmias. *Am J Cardiol* 91:59–62, 2003
7. Thibault B, Nattel S: Optimal management with class I and class III antiarrhythmic drugs should be done in the outpatient setting: protagonist. *J Cardiovasc Electrophysiol* 10:472–481, 1999
8. Yelamanchi VP, Molnar J, Ranade V, Somberg JC: Influence of electrolyte abnormalities on interlead variability of ventricular repolarization times in 12-lead electrocardiography. *Am J Ther* 8: 117–122, 2001
9. Grobbee DE, Hoes AW: Non-potassium-sparing diuretics and risk of sudden cardiac death. *J Hypertens* 13:1539–1545, 1995
10. Bouvy ML, Heerdink ER, De Bruin ML, Herings RM, Leufkens HG, Hoes AW: Use of sympathomimetic drugs leads to increased risk of hospitalization for arrhythmias in patients with congestive heart failure. *Arch Intern Med* 160:2477–2480, 2000
11. Andrassy G, Szabo A, Dunai A, Simon E, Nagy T, Trummer Z, Tahy A, Varro A: Acute effects of cigarette smoking on the QT interval in healthy smokers. *Am J Cardiol* 92:489–492, 2003
12. Esposito K, Marfella R, Gualdiero P, Carusone C, Pontillo A, Giugliano G, Nicoletti G, Giugliano D: Sympathovagal balance, nighttime blood pressure, and QT intervals in normotensive obese women. *Obes Res* 11:653–659, 2003
13. Cooke RA, Chambers JB, Singh R, Todd GJ, Smeeton NC, Treasure J, Treasure T: QT interval in anorexia nervosa. *Br Heart J* 72:69–73, 1994
